# Supplementary material for: COVID-19 Outcomes and Diabetes Mellitus: A Comprehensive Multicenter Prospective Cohort Study
Source: MDPI journal article supplement (doi:10.3390/microorganisms11061416), 2023-05-27
Supplement: s1 [file s1]

| Supplementary Table S1. Univariate and Multivariate Logistic Regression Models of In-Hospital Outcomes |                      |         |                      |         |                     |         |                      |         |                     |         |                                          |         |                                         |         |
|--------------------------------------------------------------------------------------------------------|----------------------|---------|----------------------|---------|---------------------|---------|----------------------|---------|---------------------|---------|------------------------------------------|---------|-----------------------------------------|---------|
|                                                                                                        | In-hospital death    |         |                      |         | ARDS                |         |                      |         | ICU admission       |         |                                          |         |                                         |         |
| Variables                                                                                              | OR (95% CI)          | p value | adj. OR (95% CI)     | p value | OR (95% CI)         | p value | adj. OR (95% CI)     | p value | OR (95% CI)         | p value | adj. OR (95% CI) – 1 <sup>st</sup> model | p value | adj. OR (95% CI) -2 <sup>nd</sup> model | p value |
| Male sex                                                                                               | 1.180 (0.68-2.045)   | 0.556   | 2.223 (0.887-5.572)  | 0.088   | 1.393 (0.852-2.280) | 0.187   | 2.194 (1.031-4.669)  | 0.041   | 2.222 (1.218-4.054) | 0.009   | 2.278 (1.022-5.075)                      | 0.044   | 2.575 (1.163-5.701)                     | 0.020   |
| Age (years)                                                                                            | 1.069 (1.038-1.100)  | <0.001  | 1.042 (0.998-1.087)  | 0.064   | 1.015 (0.995-1.036) | 0.143   | 1.043 (1.006-1.081)  | 0.021   | 0.985 (0.963-1.008) | 0.193   | 1.046 (1.005-1.089)                      | 0.026   | 1.050 (1.008-1.093)                     | 0.018   |
| BMI (kg/m^2)                                                                                           | 0.892 (0.829-0.96)   | 0.002   | 0.892 (0.797-0.999)  | 0.048   | 0.983 (0.936-1.032) | 0.491   | 1.007 (0.937-1.081)  | 0.853   | 1.021 (0.970-1.075) | 0.421   | 1.038 (0.966-1.116)                      | 0.311   | 1.048 (0.976-1.125)                     | 0.194   |
| HbA1c (%)                                                                                              | 1.180 (0.963-1.444)  | 0.110   | 1.146 (0.843-1.558)  | 0.384   | 1.117 (0.925-1.349) | 0.249   | 1.085 (0.845-1.393)  | 0.524   | 1.149 (0.943-1.400) | 0.168   | 1.074 (0.826-1.397)                      | 0.592   | 1.204 (0.921-1.573)                     | 0.175   |
| Antidiabetic tablets                                                                                   | 0.662 (0.315-1.394)  | 0.278   |                      |         | 1.490 (0.69-3.216)  | 0.310   |                      |         | 1.195 (0.508-2813)  | 0.684   |                                          |         |                                         |         |
| Years living with Diabetes (years)                                                                     | 1.02 (0.984-1.057)   | 0.282   |                      |         | 0.975 (0.941-1.010) | 0.153   | 0.941 (0.890-0.995)  | 0.033   | 0.943 (0.9-0.987)   | 0.012   | 0.918 (0.858-0.982)                      | 0.013   | 0.935 (0.876-0.998)                     | 0.045   |
| Metformin                                                                                              | 0.632 (0.354-1.128)  | 0.120   |                      |         | 1.027 (0.625-1.688) | 0.916   |                      |         | 1.387 (0.785-2.452) | 0.260   |                                          |         |                                         |         |
| Sulfonylureas                                                                                          | 1.155 (0.478-2.788)  | 0.749   |                      |         | 1.084 (0.487-2.414) | 0.843   |                      |         | 1.067 (0.421-2.701) | 0.891   |                                          |         |                                         |         |
| DPP4                                                                                                   | 1.846 (1.063-3.205)  | 0.03    | 2.639 (1.148-6.068)  | 0.022   | 1.945 (1.189-3.183) | 0.008   | 2.507 (1.278-4.916)  | 0.007   | 1.819 (1.032-3.207) | 0.039   | 2.524 (1.217-5.232)                      | 0.013   |                                         |         |
| GLP1-RA                                                                                                | 0.479 (0.163-1.403)  | 0.179   |                      |         | 0.68 (0.288-1.607)  | 0.380   |                      |         | 0.766 (0.286-2.057) | 0.598   |                                          |         |                                         |         |
| Insulin                                                                                                | 1.059 (0.547-2.051)  | 0.865   |                      |         | 0.679 (0.357-1.289) | 0.237   |                      |         | 0.561 (0.253-1.244) | 0.155   |                                          |         | 0.259 (0.074-0.909)                     | 0.035   |
| Insulin+GLP1RA                                                                                         | 0.794 (0.171-3.676)  | 0.768   |                      |         | 0.845 (0.23-3.102)  | 0.799   |                      |         | 0.385 (0.049-3)     | 0.362   |                                          |         |                                         |         |
| SGLT2i                                                                                                 | 0.536 (0.218-1.317)  | 0.174   |                      |         | 0.937 (0.467-1.881) | 0.937   |                      |         | 0.781 (0.333-1.831) | 0.569   |                                          |         |                                         |         |
| ACEi/ ARBs                                                                                             | 0.84 (0.481-1.466)   | 0.539   |                      |         | 0.697 (0.427-1.139) | 0.150   | 1.018 (0.411-2.521)  | 0.970   | 0.537 (0.302-0.954) | 0.034   | 0.951 (0.350-2.578)                      | 0.921   | 0.699 (0.259-1.888)                     | 0.480   |
| Statins                                                                                                | 0.828 (0.476-1.441)  | 0.505   |                      |         | 0.877 (0.537-1.433) | 0.600   |                      |         | 0.760 (0.430-1.342) | 0.344   |                                          |         |                                         |         |
| IHD                                                                                                    | 2.417 (1.342-4.353)  | 0.003   | 1.902 (0.731-4.954)  | 0.118   | 1.550 (0.892-2.692) | 0.120   | 1.218 (0.571-2.596)  | 0.610   | 1.085 (0.56-2.101)  | 0.809   |                                          |         |                                         |         |
| CVA                                                                                                    | 5.058 (2.235-11.443) | <0.001  | 5.357 (1.308-21.943) | 0.02    | 1.583 (0.687-3.649) | 0.281   | 4.319 (1.124-16.604) | 0.033   | 0.383 (0.088-1.663) | 0.200   | 1.170 (0.191-7.166)                      | 0.865   | 1.440 (0.245-8.462)                     | 0.687   |
| Revascularization of any artery                                                                        | 1.291 (0.498-3.345)  | 0.599   |                      |         | 1.212 (0.516-2.846) | 0.659   |                      |         | 1.082 (0.395-2.965) | 0.879   |                                          |         |                                         |         |
| Hypertension                                                                                           | 1.069 (0.57-2.004)   | 0.835   |                      |         | 0.653 (0.386-1.107) | 0.114   | 0.592 (0.226-1.552)  | 0.286   | 0.448 (0.249-0.808) | 0.008   | 0.407 (0.147-1.129)                      | 0.063   | 0.489 (0.179-1.340)                     | 0.164   |
| CHF                                                                                                    | 2.161 (1.094-4.270)  | 0.027   | 1.552 (0.485-4.968)  | 0.459   | 1.074 (0.542-2.127) | 0.838   |                      |         | 0.514 (0.195-1.357) | 0.179   | 0.282 (0.072-1.105)                      | 0.069   | 0.340 (0.087-1.328)                     | 0.121   |
| Malignancy                                                                                             | 2.780 (1.165-6.631)  | 0.021   | 1.093 (0.248-4.822)  | 0.907   | 2.103 (0.916-4.831) | 0.080   | 1.379 (0.366-5.195)  | 0.635   | 1.241 (0.448-3.439) | 0.678   |                                          |         |                                         |         |
| ESRD                                                                                                   | 3.345 (1.761-6.353)  | <0.001  | 2.226 (0.867-5.718)  | 0.096   | 1.483 (0.789-2.789) | 0.221   | 0.925 (0.364-2.350)  | 0.870   | 0.837 (0.373-1.879) | 0.666   |                                          |         |                                         |         |
| Immunosuppresion                                                                                       | 1.843 (0.685-4.959)  | 0.226   |                      |         | 1.261 (0.473-3.359) | 0.643   |                      |         | 0.522 (0.118-2.308) | 0.392   |                                          |         |                                         |         |

|                                                                                                                                                                                                                                                                                                                                                                                                                                                                                   |                     |       |                      |       |                     |       |                     |       |                      |       |                     |       |                     |       |
|-----------------------------------------------------------------------------------------------------------------------------------------------------------------------------------------------------------------------------------------------------------------------------------------------------------------------------------------------------------------------------------------------------------------------------------------------------------------------------------|---------------------|-------|----------------------|-------|---------------------|-------|---------------------|-------|----------------------|-------|---------------------|-------|---------------------|-------|
| Liver disease                                                                                                                                                                                                                                                                                                                                                                                                                                                                     | 0.733 (0.087-6.205) | 0.776 |                      |       | 1.274 (0.243-6.692) | 0.775 |                     |       | 2.111 (0.399-11.163) | 0.379 |                     |       |                     |       |
| COPD                                                                                                                                                                                                                                                                                                                                                                                                                                                                              | 1.309 (0.59-2.906)  | 0.508 |                      |       | 1.476 (0.73-2.984)  | 0.279 | 1.416 (0.571-3.508) | 0.453 | 1.219 (0.533-2.789)  | 0.639 |                     |       |                     |       |
| Chronic cognitive deficit                                                                                                                                                                                                                                                                                                                                                                                                                                                         | 2.616 (1.056-6.484) | 0.038 | 4.163 (1.064-16.288) | 0.040 | 1.131 (0.431-2.969) | 0.802 |                     |       | 0.226 (0.03-1.709)   | 0.150 | 0.141 (0.014-1.416) | 0.096 | 0.172 (0.018-1.619) | 0.124 |
| OR; odds ratio, adj OR; adjusted odds ratio, BMI; Body mass index, DPP4i; Dipeptidyl peptidase 4 inhibitors, GLP1-RA; Glucagon-like peptide-1 receptor agonists, SGLT2i; Sodium-glucose cotransporter-2 inhibitors, ACEi; Angiotensin-converting enzyme inhibitors, ARBs; Angiotensin II receptor blockers, IHD; Ischemic Heart disease, CVA; cerebrovascular accident, CHF; congestive heart failure, ESRD; end stage renal disease, COPD; chronic obstructive pulmonary disease |                     |       |                      |       |                     |       |                     |       |                      |       |                     |       |                     |       |

| Supplementary Table S2. Cox proportional regression model for 28-day mortality                                     |         |          |          |        |
|--------------------------------------------------------------------------------------------------------------------|---------|----------|----------|--------|
|                                                                                                                    | p value | adj. HRs | 95,0% CI |        |
|                                                                                                                    |         |          | Lower    | Upper  |
| Male gender                                                                                                        | 0,012   | 2,468    | 1,222    | 4,984  |
| BMI (kg/m²)                                                                                                        | 0,250   | 0,960    | 0,895    | 1,029  |
| Age (years)                                                                                                        | 0,003   | 1,058    | 1,019    | 1,099  |
| Ischemic Heart Disease                                                                                             | 0,070   | 1,893    | 0,949    | 3,774  |
| Cerebrovascular accident                                                                                           | 0,050   | 2,379    | 0,999    | 5,663  |
| End-stage kidney disease                                                                                           | 0,160   | 1,688    | 0,813    | 3,507  |
| DPP4 inhibitors                                                                                                    | 0,027   | 2,014    | 1,082    | 3,750  |
| Congestive Heart Failure                                                                                           | 0,839   | 0,917    | 0,397    | 2,118  |
| Malignancy                                                                                                         | 0,919   | 1,049    | 0,419    | 2,626  |
| Chronic neurologic deficit                                                                                         | 0,001   | 4,262    | 1,759    | 10,322 |
| Years since T2D diagnosis                                                                                          | 0,021   | 0,948    | 0,905    | 0,992  |
| Adj. HRs; adjusted hazard ratios, BMI; Body mass index, DPP4i; Dipeptidyl peptidase 4 (DPP4), T2D; Type 2 Diabetes |         |          |          |        |
